# Supplementary material
Source: MDPI journal article supplement (https://www.mdpi.com/2304-6740/11/4/155)
Supplement: s1 [file s1]

# In-situ synthesis of Ti:Fe<sub>2</sub>O<sub>3</sub>/Cu<sub>2</sub>O p–n junction for highly efficient photogenerated carriers separation

Tie Shi<sup>1</sup>, Yanmei Feng<sup>1</sup>, Yi Zhong<sup>1</sup>, Hao Ding<sup>1</sup>, Kai Chen<sup>2</sup>, Daimei Chen<sup>1,\*</sup>

<sup>1</sup> Engineering Research Center of Ministry of Education for Geological Carbon Storage and Low Carbon Utilization of Resources, Beijing Key Laboratory of Materials Utilization of Nonmetallic Minerals and Solid Wastes, National Laboratory of Mineral Materials, School of Material Sciences and Technology, China University of Geosciences, Beijing 100083, China

<sup>2</sup> Collaborative Innovation Center of Atmospheric Environment and Equipment Technology, Jiangsu Key Laboratory of Atmospheric Environment Monitoring, and Pollution Control School of Environmental Science and Engineering, Nanjing University of Information Science and Technology, Nanjing 210044, China

## 1. Supplemental Figures

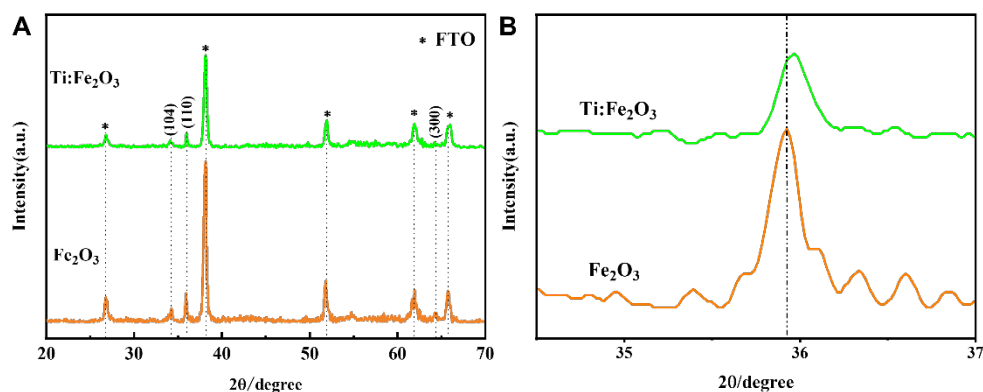

Figure S1. (A) XRD spectra of pure Fe<sub>2</sub>O<sub>3</sub> and Ti:Fe<sub>2</sub>O<sub>3</sub>. (B) The enlarged XRD spectra of the (110)

peaks of Fe<sub>2</sub>O<sub>3</sub> and Ti:Fe<sub>2</sub>O<sub>3</sub>.

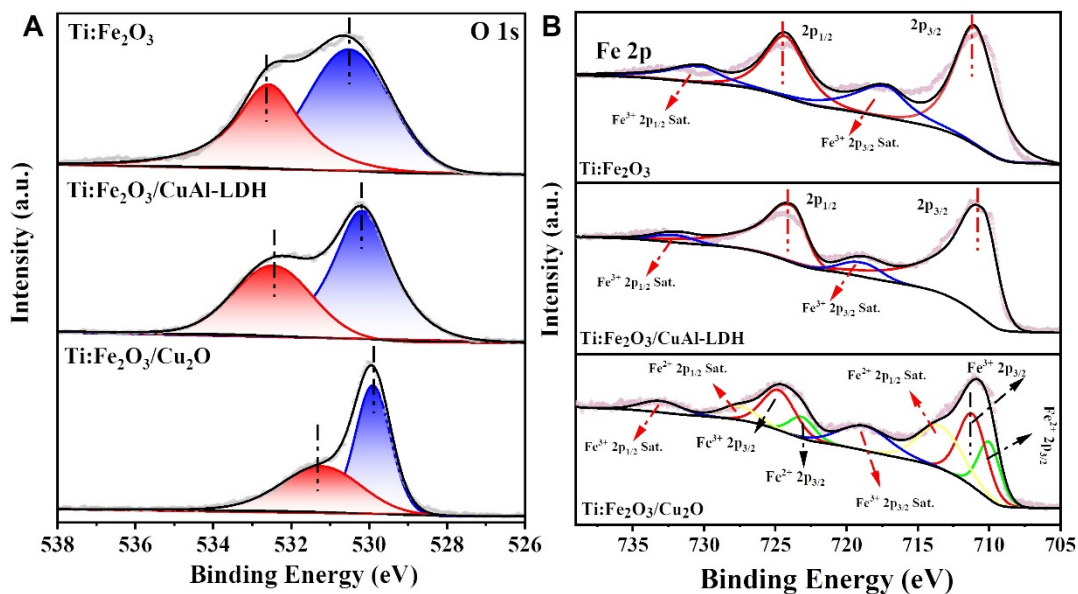

Figure S2. XPS spectra of Ti:Fe<sub>2</sub>O<sub>3</sub>, Ti:Fe<sub>2</sub>O<sub>3</sub>/CuAl-LDH and Ti:Fe<sub>2</sub>O<sub>3</sub>/Cu<sub>2</sub>O: (A) O 1s, (B) Fe 2p

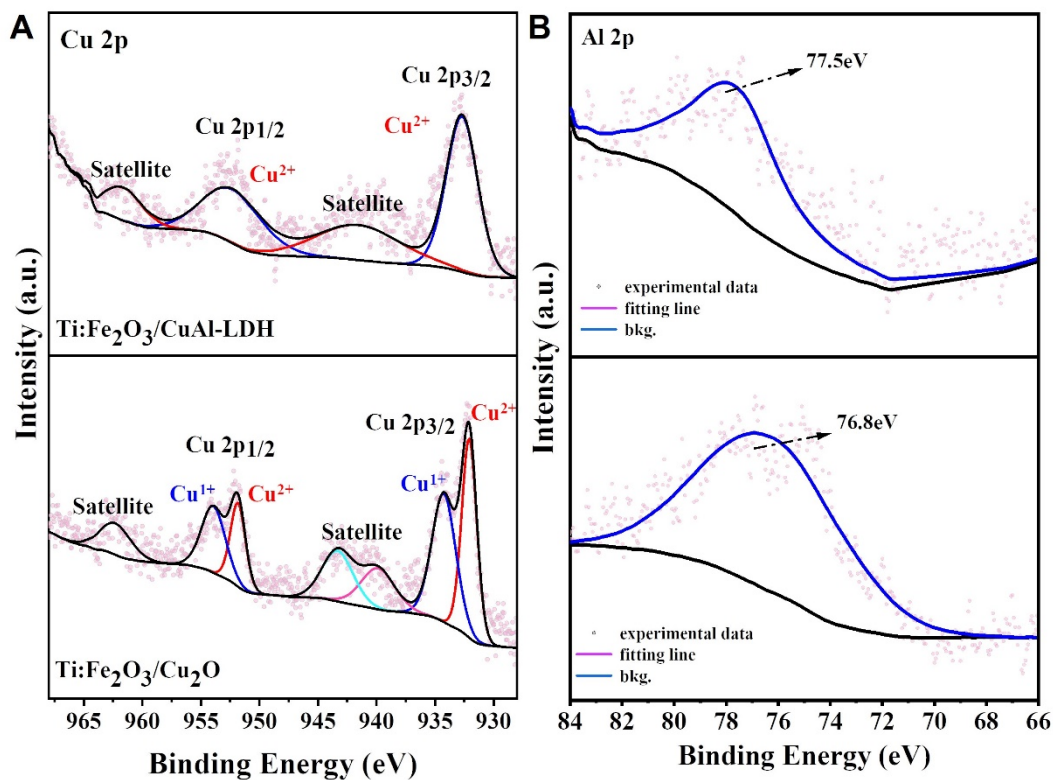

Figure S3. XPS spectra of Ti:Fe<sub>2</sub>O<sub>3</sub>/CuAl-LDH and Ti:Fe<sub>2</sub>O<sub>3</sub>/Cu<sub>2</sub>O: (A) Cu 2p, and (B) Al 2p

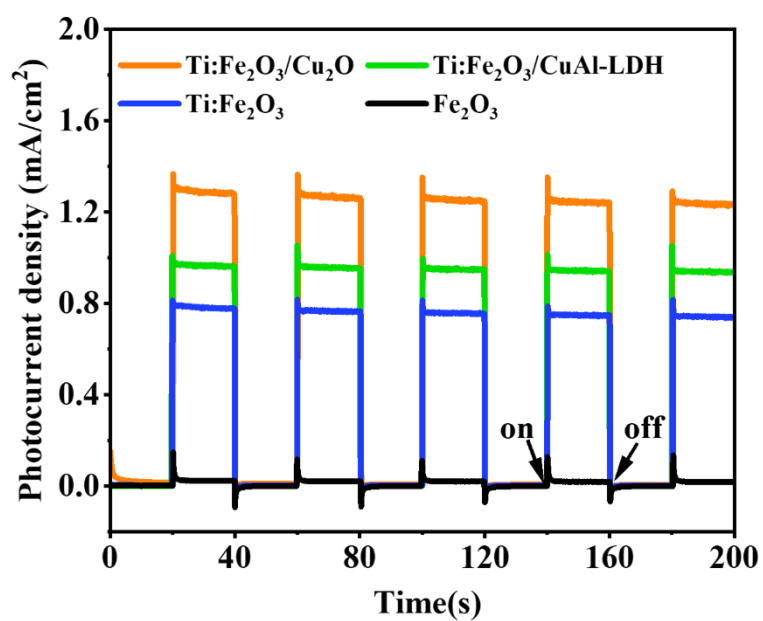

Figure S4. photocurrent density vs. time (I-T) curve

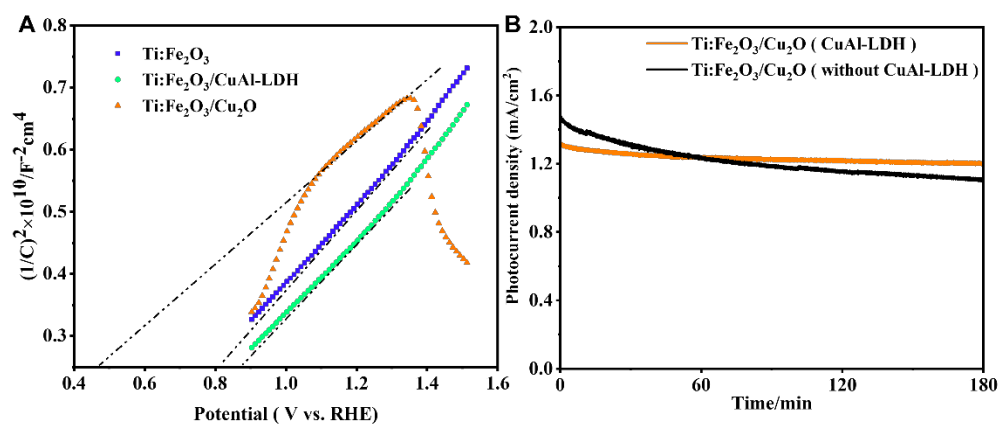

Figure S5. (A) M-S plots of Ti:Fe<sub>2</sub>O<sub>3</sub>, Ti:Fe<sub>2</sub>O<sub>3</sub>/CuAl-LDH, and Ti:Fe<sub>2</sub>O<sub>3</sub>/Cu<sub>2</sub>O photoanode.

(B) Photoanode stability test

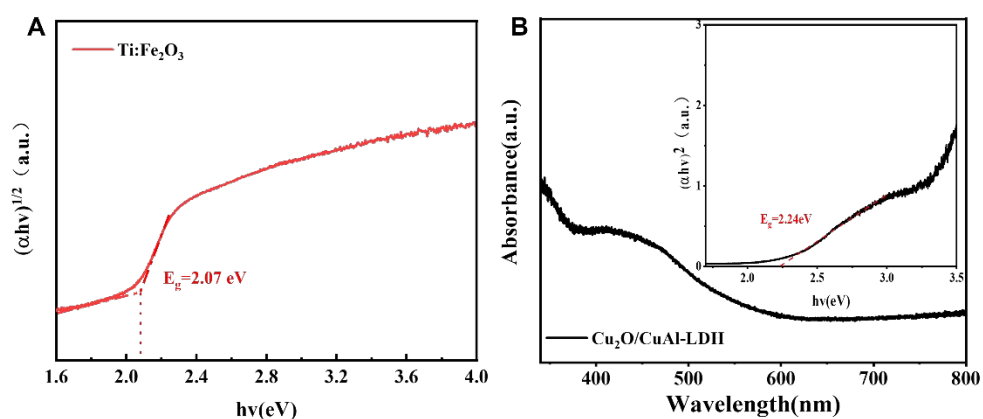

Figure S6. (A) plots of the  $(\alpha h\nu)^{1/2}$  vs photon energy ( $h\nu$ ) for  $\text{Ti:Fe}_2\text{O}_3$ . (B) UV-vis DRS (inset: plots of the  $(\alpha h\nu)^2$  vs photon energy ( $h\nu$ ) for  $\text{CuAl-LDH/Cu}_2\text{O}$ ) of  $\text{CuAl-LDH/Cu}_2\text{O}$

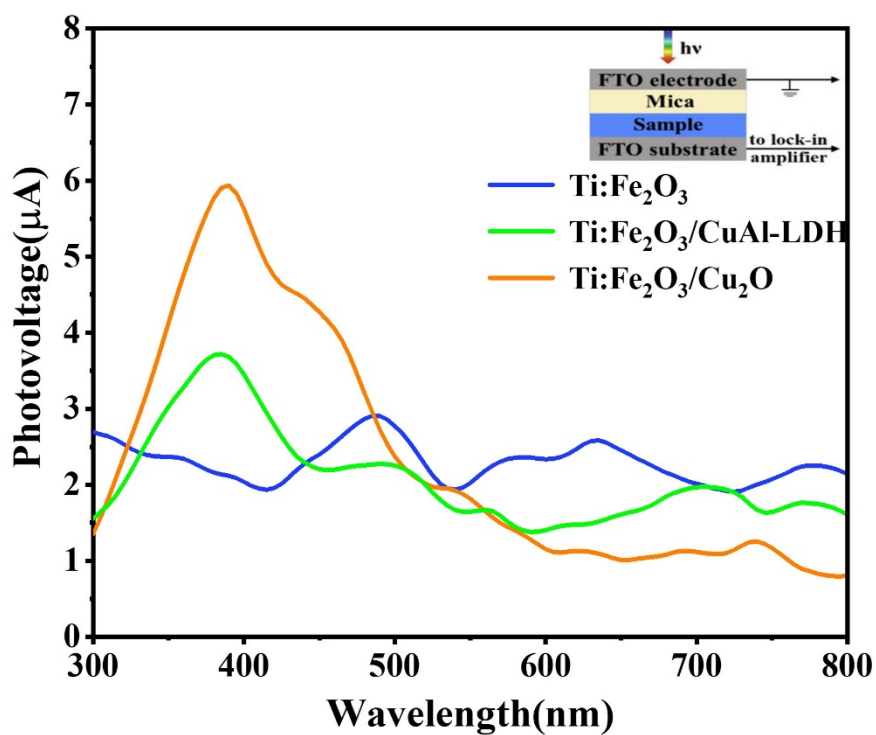

Figure S7. Surface photovoltage (SPV) plots, the insert in (a) is the SPV measurement configuration

Table S1 Comparison of Photocurrent density with other Fe<sub>2</sub>O<sub>3</sub> materials

| No. | Samples                                                                          | Photocurrent density(mA/cm <sup>2</sup> )                                      |                                                                                                                               |       | Ref.      |
|-----|----------------------------------------------------------------------------------|--------------------------------------------------------------------------------|-------------------------------------------------------------------------------------------------------------------------------|-------|-----------|
|     |                                                                                  | Before                                                                         | After                                                                                                                         | Ratio |           |
| 1.  | Ti:Fe <sub>2</sub> O <sub>3</sub> /Cu <sub>2</sub> O                             | Fe <sub>2</sub> O <sub>3</sub><br>0.027 mA/cm <sup>2</sup><br>(1.23V vs.RHE)   | Ti:Fe <sub>2</sub> O <sub>3</sub> /Cu <sub>2</sub> O<br>1.35 mA/cm <sup>2</sup><br>(1.23V vs.RHE)                             | 50    | This work |
| 2.  | Ti-Fe <sub>2</sub> O <sub>3</sub> /Cu <sub>2</sub> O                             | Fe <sub>2</sub> O <sub>3</sub><br>0.16 mA/cm <sup>2</sup><br>(0.95V vs.SCE)    | Ti-Fe <sub>2</sub> O <sub>3</sub> /Cu <sub>2</sub> O<br>2.6 mA/cm <sup>2</sup><br>(0.95V vs.SCE)                              | 16.25 | [1]       |
| 3.  | Fe <sub>2</sub> O <sub>3</sub> /Al <sub>2</sub> O <sub>3</sub> /CoO <sub>x</sub> | Fe <sub>2</sub> O <sub>3</sub><br>0.12 mA/cm <sup>2</sup><br>(1.23V vs.RHE)    | Fe <sub>2</sub> O <sub>3</sub> /Al <sub>2</sub> O <sub>3</sub> /CoO <sub>x</sub><br>2.23 mA/cm <sup>2</sup><br>(1.23V vs.RHE) | 18.6  | [2]       |
| 4.  | Fh/Fe <sub>2</sub> O <sub>3</sub>                                                | Fh/Fe <sub>2</sub> O <sub>3</sub><br>0.18 mA/cm <sup>2</sup><br>(1.23V vs.RHE) | Fh/Fe <sub>2</sub> O <sub>3</sub><br>0.5 mA/cm <sup>2</sup><br>(1.23V vs.RHE)                                                 | 2.78  | [3]       |
| 5.  | TiFe@NC-0.02                                                                     | TiFe<br>0.65 mA/cm <sup>2</sup><br>(1.8 vs.RHE)                                | TiFe@NC-0.02<br>1.7mA/cm <sup>2</sup><br>(1.8V vs.RHE)                                                                        | 2.6   | [4]       |
| 6.  | CF-modified hematite                                                             | Hematite<br>0.53 mA/cm <sup>2</sup><br>(1.23V vs.RHE)                          | CF-modified hematite<br>1.06 mA/cm <sup>2</sup>                                                                               | 2     | [5]       |
| 7.  | Fe <sub>2</sub> TiO <sub>5</sub> /Fe <sub>2</sub> O <sub>3</sub> /Pt             | Fe <sub>2</sub> O <sub>3</sub><br>0.5 mA/cm <sup>2</sup><br>(1.23V vs.RHE)     | Fe <sub>2</sub> TiO <sub>5</sub> /Fe <sub>2</sub> O <sub>3</sub> /Pt<br>1.0 mA/cm <sup>2</sup><br>(1.23V vs.RHE)              | 2     | [6]       |

## Reference

- [1] D Sharma, S Upadhyay, A Verma, VR Satsangi, R Shrivastav, S Dass (2015) Thin Solid Films 574: 125. Doi:<https://doi.org/10.1016/j.tsf.2014.12.003>
- [2] S Zhang, Z Liu, D Chen, W Yan (2020) Applied Catalysis B: Environmental 277: 119197. Doi:<https://doi.org/10.1016/j.apcatb.2020.119197>
- [3] X He, C Shang, Q Meng, et al. (2020) Nanotechnology 31: 455405. Doi:10.1088/1361-6528/ab8e74
- [4] T-T Kong, J Huang, X-G Jia, W-Z Wang, Y Zhou, Z-G Zou (2020) Applied Catalysis B: Environmental 275: 119113. Doi:<https://doi.org/10.1016/j.apcatb.2020.119113>
- [5] MG Ahmed, TA Kandiel, AY Ahmed, I Kretschmer, F Rashwan, D Bahnemann (2015) The Journal of Physical Chemistry C 119: 5864. Doi:10.1021/jp512804p
- [6] L Wang, NT Nguyen, X Huang, P Schmuki, Y Bi (2017) Advanced Functional Materials 27: 1703527. Doi:<https://doi.org/10.1002/adfm.201703527>
